# Supplementary material
Source: publisher figshare collection journal article supplement (https://acs.figshare.com/ndownloader/files/5339257)
Supplement: Supplementary file 1 [file 5339257]

 
data_3aj
 
_audit_creation_method            SHELXL-97
_chemical_name_systematic
;
 ?
;
_chemical_name_common             ?
_chemical_melting_point           ?
_chemical_formula_moiety          ?
_chemical_formula_sum
 'C13 H14 N2 O2 S'
_chemical_formula_weight          262.32
 
loop_
 _atom_type_symbol
 _atom_type_description
 _atom_type_scat_dispersion_real
 _atom_type_scat_dispersion_imag
 _atom_type_scat_source
 'C'  'C'   0.0033   0.0016
 'International Tables Vol C Tables 4.2.6.8 and 6.1.1.4'
 'H'  'H'   0.0000   0.0000
 'International Tables Vol C Tables 4.2.6.8 and 6.1.1.4'
 'N'  'N'   0.0061   0.0033
 'International Tables Vol C Tables 4.2.6.8 and 6.1.1.4'
 'O'  'O'   0.0106   0.0060
 'International Tables Vol C Tables 4.2.6.8 and 6.1.1.4'
 'S'  'S'   0.1246   0.1234
 'International Tables Vol C Tables 4.2.6.8 and 6.1.1.4'
 
_symmetry_cell_setting            'Monoclinic'
_symmetry_space_group_name_H-M    'P 21'
 
loop_
 _symmetry_equiv_pos_as_xyz
 'x, y, z'
 '-x, y+1/2, -z'
 
_cell_length_a                    8.3873(11)
_cell_length_b                    5.5964(4)
_cell_length_c                    14.1809(17)
_cell_angle_alpha                 90.00
_cell_angle_beta                  100.650(4)
_cell_angle_gamma                 90.00
_cell_volume                      654.17(13)
_cell_formula_units_Z             2
_cell_measurement_temperature     293(2)
_cell_measurement_reflns_used     3347
_cell_measurement_theta_min       0.998
_cell_measurement_theta_max       27.485
 
_exptl_crystal_description        'Needle'
_exptl_crystal_colour             'colorless'
_exptl_crystal_size_max           0.50
_exptl_crystal_size_mid           0.20
_exptl_crystal_size_min           0.10
_exptl_crystal_density_meas       ?
_exptl_crystal_density_diffrn     1.332
_exptl_crystal_density_method     'not measured'
_exptl_crystal_F_000              276
_exptl_absorpt_coefficient_mu     0.243
_exptl_absorpt_correction_type    'empirical'
_exptl_absorpt_correction_T_min   0.8882
_exptl_absorpt_correction_T_max   0.9761
_exptl_absorpt_process_details    
'R. H. Blessing, Acta Crystallogr., Sect A 1995, 51, 33-38.'
 
_exptl_special_details
;
 ?
;
 
_diffrn_ambient_temperature       293(2)
_diffrn_radiation_wavelength      0.71073
_diffrn_radiation_type            MoK\a
_diffrn_radiation_source          'fine-focus sealed tube'
_diffrn_radiation_monochromator   graphite
_diffrn_measurement_device_type   'KappaCCD'
_diffrn_measurement_method        'CCD'
_diffrn_detector_area_resol_mean  9
_diffrn_standards_number          ?
_diffrn_standards_interval_count  ?
_diffrn_standards_interval_time   ?
_diffrn_standards_decay_%         ?
_diffrn_reflns_number             3370
_diffrn_reflns_av_R_equivalents   0.0218
_diffrn_reflns_av_sigmaI/netI     0.0456
_diffrn_reflns_limit_h_min        -10
_diffrn_reflns_limit_h_max        8
_diffrn_reflns_limit_k_min        -7
_diffrn_reflns_limit_k_max        6
_diffrn_reflns_limit_l_min        -18
_diffrn_reflns_limit_l_max        18
_diffrn_reflns_theta_min          3.92
_diffrn_reflns_theta_max          27.42
_reflns_number_total              2688
_reflns_number_gt                 2251
_reflns_threshold_expression      >2sigma(I)
 
_computing_data_collection 'Collect (Bruker AXS BV, 1997-2004)'
_computing_cell_refinement 'HKL Scalepack (Otwinowski & Minor 1997)'
_computing_data_reduction 'HKL Denzo and Scalepack (Otwinowski & Minor 1997)'
_computing_structure_solution     'SHELXS-97 (Sheldrick, 1990)' 
_computing_structure_refinement   'SHELXL-97 (Sheldrick, 1997)'
_computing_molecular_graphics     'ORTEP3'
_computing_publication_material   ?
 
_refine_special_details
;
 Refinement of F^2^ against ALL reflections.  The weighted R-factor wR and
 goodness of fit S are based on F^2^, conventional R-factors R are based
 on F, with F set to zero for negative F^2^. The threshold expression of
 F^2^ > 2sigma(F^2^) is used only for calculating R-factors(gt) etc. and is
 not relevant to the choice of reflections for refinement.  R-factors based
 on F^2^ are statistically about twice as large as those based on F, and R-
 factors based on ALL data will be even larger.
;
 
_refine_ls_structure_factor_coef  Fsqd
_refine_ls_matrix_type            full
_refine_ls_weighting_scheme       calc
_refine_ls_weighting_details
 'calc w=1/[\s^2^(Fo^2^)+(0.0410P)^2^+0.1134P] where P=(Fo^2^+2Fc^2^)/3'
_atom_sites_solution_primary      direct
_atom_sites_solution_secondary    difmap
_atom_sites_solution_hydrogens    geom
_refine_ls_hydrogen_treatment     mixed
_refine_ls_extinction_method      none
_refine_ls_extinction_coef        ?
_refine_ls_abs_structure_details
 'Flack H D (1983), Acta Cryst. A39, 876-881'
_refine_ls_abs_structure_Flack    0.24(9)
_refine_ls_number_reflns          2688
_refine_ls_number_parameters      164
_refine_ls_number_restraints      1
_refine_ls_R_factor_all           0.0574
_refine_ls_R_factor_gt            0.0431
_refine_ls_wR_factor_ref          0.1035
_refine_ls_wR_factor_gt           0.0960
_refine_ls_goodness_of_fit_ref    1.052
_refine_ls_restrained_S_all       1.052
_refine_ls_shift/su_max           0.000
_refine_ls_shift/su_mean          0.000
 
loop_
 _atom_site_label
 _atom_site_type_symbol
 _atom_site_fract_x
 _atom_site_fract_y
 _atom_site_fract_z
 _atom_site_U_iso_or_equiv
 _atom_site_adp_type
 _atom_site_occupancy
 _atom_site_symmetry_multiplicity
 _atom_site_calc_flag
 _atom_site_refinement_flags
 _atom_site_disorder_assembly
 _atom_site_disorder_group
C1 C 0.8514(4) 0.6124(7) 0.0244(3) 0.0880(11) Uani 1 1 d . . .
H1A H 0.8215 0.7615 -0.0075 0.132 Uiso 1 1 calc R . .
H1B H 0.8615 0.4921 -0.0225 0.132 Uiso 1 1 calc R . .
H1C H 0.9533 0.6304 0.0676 0.132 Uiso 1 1 calc R . .
C2 C 0.7230(3) 0.5389(5) 0.07989(19) 0.0546(7) Uani 1 1 d . . .
C3 C 0.5890(3) 0.6821(5) 0.08239(19) 0.0572(7) Uani 1 1 d . . .
H3 H 0.5768 0.8237 0.0475 0.069 Uiso 1 1 calc R . .
C4 C 0.4734(3) 0.6196(5) 0.13537(19) 0.0557(7) Uani 1 1 d . . .
H4 H 0.3850 0.7188 0.1368 0.067 Uiso 1 1 calc R . .
C5 C 0.4902(3) 0.4079(4) 0.18639(18) 0.0476(6) Uani 1 1 d . . .
C6 C 0.6229(3) 0.2619(4) 0.18496(19) 0.0538(7) Uani 1 1 d . . .
H6 H 0.6347 0.1199 0.2196 0.065 Uiso 1 1 calc R . .
C7 C 0.7372(3) 0.3284(6) 0.13183(18) 0.0585(6) Uani 1 1 d . . .
H7 H 0.8261 0.2297 0.1308 0.070 Uiso 1 1 calc R . .
C8 C 0.4218(4) 0.4919(5) 0.3672(2) 0.0627(8) Uani 1 1 d . . .
H8A H 0.5383 0.4716 0.3850 0.075 Uiso 1 1 calc R . .
H8B H 0.3994 0.6609 0.3569 0.075 Uiso 1 1 calc R . .
C9 C 0.3411(3) 0.4024(6) 0.4478(2) 0.0647(8) Uani 1 1 d . . .
H9 H 0.3569 0.2440 0.4671 0.078 Uiso 1 1 calc R . .
C10 C 0.2524(3) 0.5347(5) 0.4903(2) 0.0606(7) Uani 1 1 d . . .
H10 H 0.2366 0.6922 0.4697 0.073 Uiso 1 1 calc R . .
C11 C 0.0740(4) 0.5917(5) 0.6060(2) 0.0666(8) Uani 1 1 d . . .
H11 H 0.0430 0.7485 0.5904 0.080 Uiso 1 1 calc R . .
C12 C 0.0237(4) 0.4559(6) 0.6728(2) 0.0706(9) Uani 1 1 d . . .
H12 H -0.0484 0.4983 0.7125 0.085 Uiso 1 1 calc R . .
C13 C 0.1014(3) 0.2410(6) 0.6698(2) 0.0609(7) Uani 1 1 d . . .
H13 H 0.0895 0.1122 0.7094 0.073 Uiso 1 1 calc R . .
N1 N 0.1769(3) 0.4603(4) 0.56589(15) 0.0514(5) Uani 1 1 d . . .
N2 N 0.1948(3) 0.2374(4) 0.60449(16) 0.0590(6) Uani 1 1 d . . .
O1 O 0.3639(3) 0.0811(4) 0.28019(19) 0.0881(8) Uani 1 1 d . . .
O2 O 0.1926(2) 0.4230(5) 0.21714(15) 0.0794(7) Uani 1 1 d . . .
S1 S 0.34883(8) 0.33197(11) 0.25909(5) 0.0564(2) Uani 1 1 d . . .
 
loop_
 _atom_site_aniso_label
 _atom_site_aniso_U_11
 _atom_site_aniso_U_22
 _atom_site_aniso_U_33
 _atom_site_aniso_U_23
 _atom_site_aniso_U_13
 _atom_site_aniso_U_12
C1 0.073(2) 0.110(3) 0.089(2) 0.014(2) 0.0334(19) -0.004(2)
C2 0.0544(16) 0.0604(16) 0.0494(15) 0.0010(12) 0.0105(12) -0.0049(13)
C3 0.0681(18) 0.0487(15) 0.0543(15) 0.0083(12) 0.0102(13) -0.0019(13)
C4 0.0546(16) 0.0516(15) 0.0607(16) 0.0000(12) 0.0104(13) 0.0068(12)
C5 0.0471(13) 0.0466(15) 0.0485(13) -0.0032(10) 0.0070(11) -0.0038(10)
C6 0.0537(15) 0.0459(16) 0.0610(16) 0.0061(11) 0.0086(12) 0.0018(11)
C7 0.0500(14) 0.0614(15) 0.0646(15) 0.0010(16) 0.0119(12) 0.0055(15)
C8 0.0563(17) 0.079(2) 0.0522(15) -0.0014(13) 0.0095(13) -0.0177(14)
C9 0.0553(16) 0.070(2) 0.0663(17) 0.0046(14) 0.0053(14) -0.0019(13)
C10 0.0605(17) 0.0551(16) 0.0612(17) 0.0027(13) -0.0014(14) -0.0067(14)
C11 0.0668(19) 0.0540(17) 0.0729(19) -0.0110(15) -0.0028(16) 0.0171(14)
C12 0.0537(18) 0.092(2) 0.0656(19) -0.0223(18) 0.0096(15) 0.0094(15)
C13 0.0621(18) 0.0688(18) 0.0534(15) 0.0008(13) 0.0148(14) -0.0005(14)
N1 0.0508(13) 0.0547(13) 0.0466(12) 0.0026(10) 0.0032(10) -0.0002(10)
N2 0.0591(14) 0.0597(14) 0.0602(14) 0.0058(11) 0.0163(11) 0.0158(11)
O1 0.1018(18) 0.0552(13) 0.1211(19) 0.0010(13) 0.0561(16) -0.0193(12)
O2 0.0423(10) 0.1274(19) 0.0678(12) -0.0092(12) 0.0081(9) -0.0039(10)
S1 0.0491(3) 0.0617(4) 0.0603(4) -0.0047(3) 0.0145(3) -0.0114(3)
 
_geom_special_details
;
 All esds (except the esd in the dihedral angle between two l.s. planes)
 are estimated using the full covariance matrix.  The cell esds are taken
 into account individually in the estimation of esds in distances, angles
 and torsion angles; correlations between esds in cell parameters are only
 used when they are defined by crystal symmetry.  An approximate (isotropic)
 treatment of cell esds is used for estimating esds involving l.s. planes.
;
 
loop_
 _geom_bond_atom_site_label_1
 _geom_bond_atom_site_label_2
 _geom_bond_distance
 _geom_bond_site_symmetry_2
 _geom_bond_publ_flag
C1 C2 1.505(4) . ?
C2 C7 1.383(4) . ?
C2 C3 1.386(4) . ?
C3 C4 1.377(4) . ?
C4 C5 1.382(4) . ?
C5 C6 1.384(3) . ?
C5 S1 1.761(3) . ?
C6 C7 1.376(3) . ?
C8 C9 1.517(4) . ?
C8 S1 1.783(3) . ?
C9 C10 1.278(4) . ?
C10 N1 1.405(4) . ?
C11 N1 1.338(4) . ?
C11 C12 1.342(5) . ?
C12 C13 1.373(4) . ?
C13 N2 1.319(3) . ?
N1 N2 1.359(3) . ?
O1 S1 1.436(2) . ?
O2 S1 1.429(2) . ?
 
loop_
 _geom_angle_atom_site_label_1
 _geom_angle_atom_site_label_2
 _geom_angle_atom_site_label_3
 _geom_angle
 _geom_angle_site_symmetry_1
 _geom_angle_site_symmetry_3
 _geom_angle_publ_flag
C7 C2 C3 118.0(2) . . ?
C7 C2 C1 120.8(3) . . ?
C3 C2 C1 121.2(3) . . ?
C4 C3 C2 121.5(2) . . ?
C3 C4 C5 119.4(2) . . ?
C4 C5 C6 120.2(2) . . ?
C4 C5 S1 119.96(19) . . ?
C6 C5 S1 119.8(2) . . ?
C7 C6 C5 119.5(2) . . ?
C6 C7 C2 121.5(3) . . ?
C9 C8 S1 110.61(19) . . ?
C10 C9 C8 123.0(3) . . ?
C9 C10 N1 124.9(3) . . ?
N1 C11 C12 107.5(3) . . ?
C11 C12 C13 105.2(3) . . ?
N2 C13 C12 112.4(3) . . ?
C11 N1 N2 111.4(2) . . ?
C11 N1 C10 125.3(3) . . ?
N2 N1 C10 123.2(2) . . ?
C13 N2 N1 103.5(2) . . ?
O2 S1 O1 118.30(16) . . ?
O2 S1 C5 109.57(13) . . ?
O1 S1 C5 108.36(13) . . ?
O2 S1 C8 108.76(15) . . ?
O1 S1 C8 107.96(16) . . ?
C5 S1 C8 102.78(12) . . ?
 
_diffrn_measured_fraction_theta_max    0.990
_diffrn_reflns_theta_full              27.42
_diffrn_measured_fraction_theta_full   0.990
_refine_diff_density_max    0.312
_refine_diff_density_min   -0.181
_refine_diff_density_rms    0.033
